# Supplementary material for: Deep brain stimulation rectifies the noisy cortex and irresponsive subthalamus to improve parkinsonian locomotor activities
Source: PubMed Central journal article supplement (PMC9209473; doi:10.1038/s41531-022-00343-6), 2022-06-20
Supplement: 41531_2022_343_MOESM1_ESM.pdf [file 41531_2022_343_MOESM1_ESM.pdf]

# Supplementary Information

for

Deep Brain Stimulation Rectifies the Noisy Cortex and Irresponsive Subthalamus to Improve Parkinsonian Locomotor Activities.

Lan-Hsin Nancy Lee, Chen-Syuan Huang, Ren-Wei Wang, Hsing-Jung Lai, Chih-Ching Chung, Ya-Chin Yang, and Chung-Chin Kuo

## Supplementary Figure 1

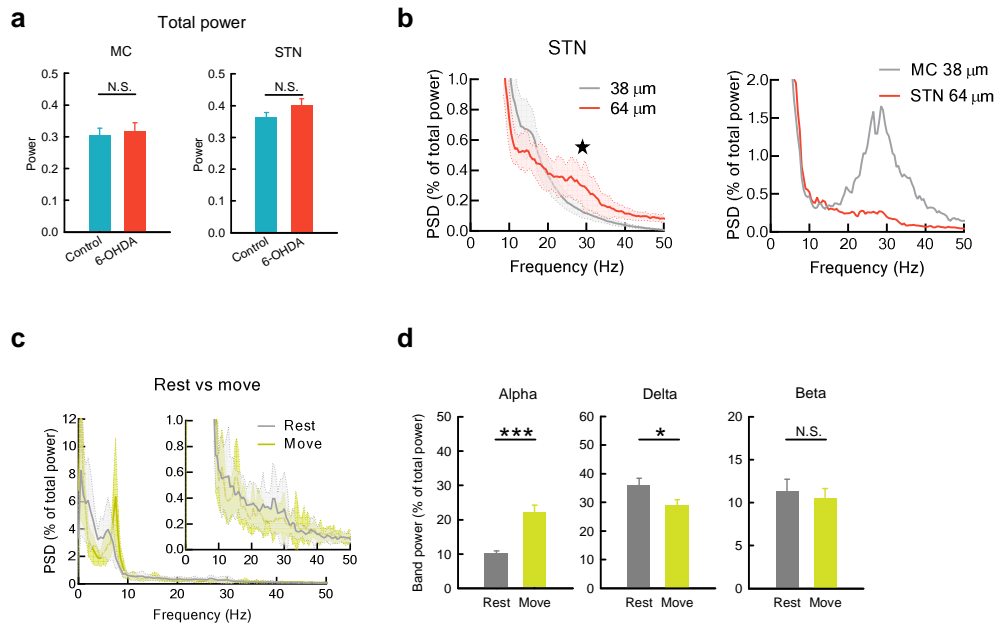

### Supplementary Figure 1. The total power LFP analysis and recording with thicker electrodes

**a** There is no difference in the total power from 0-250 Hz LFP spectral analysis of 5-minute recordings in open field tests (OFT) between control and parkinsonian (6-OHDA) rats in both MC and STN. The analyses are from the same recordings in Fig. 1 ( $n = 29$  recordings from 10 control rats,  $n = 20$  recordings from 11 parkinsonian rats). **b** Left: Average PSD spectra of LFP recordings in STN using 38- $\mu\text{m}$  (data from Fig. 1) or 64- $\mu\text{m}$  electrodes from 20 and 9 parkinsonian rats in OFT, respectively. There is a better detection of the  $\beta$  peak in STN with thicker electrodes (star mark). Right: PSD spectra of a 2-minute LFP recording in OFT shows a more prominent  $\beta$  peak in MC than in STN from a parkinsonian rat where thicker (64  $\mu\text{m}$ ) electrodes are implanted in STN. **c** Average PSD spectra in STN recorded with 64  $\mu\text{m}$  electrodes show a marked increase of  $\alpha$  but not  $\beta$  power from rest to movement in parkinsonian rats ( $n = 14$  segments during 10-second continuous rest or movement periods from 9 rats). **d** The band power analysis from part **c** reveals a significant increase of the  $\alpha$  power and decrease of the  $\delta$  power from rest to movement in parkinsonian rats. The  $\beta$  band power shows no difference from rest to movement. The results are similar to those obtained with 38  $\mu\text{m}$  recording electrodes in Fig. 1. PSD spectra are presented as mean (solid curves)  $\pm$  standard deviation (shaded areas). Data in bar graphs are presented as mean  $\pm$  S.E.M. and analyzed with Mann-Whitney U tests. \* $p < 0.05$ , \*\*\* $p < 0.001$ , N.S., nonsignificant.

## Supplementary Figure 2

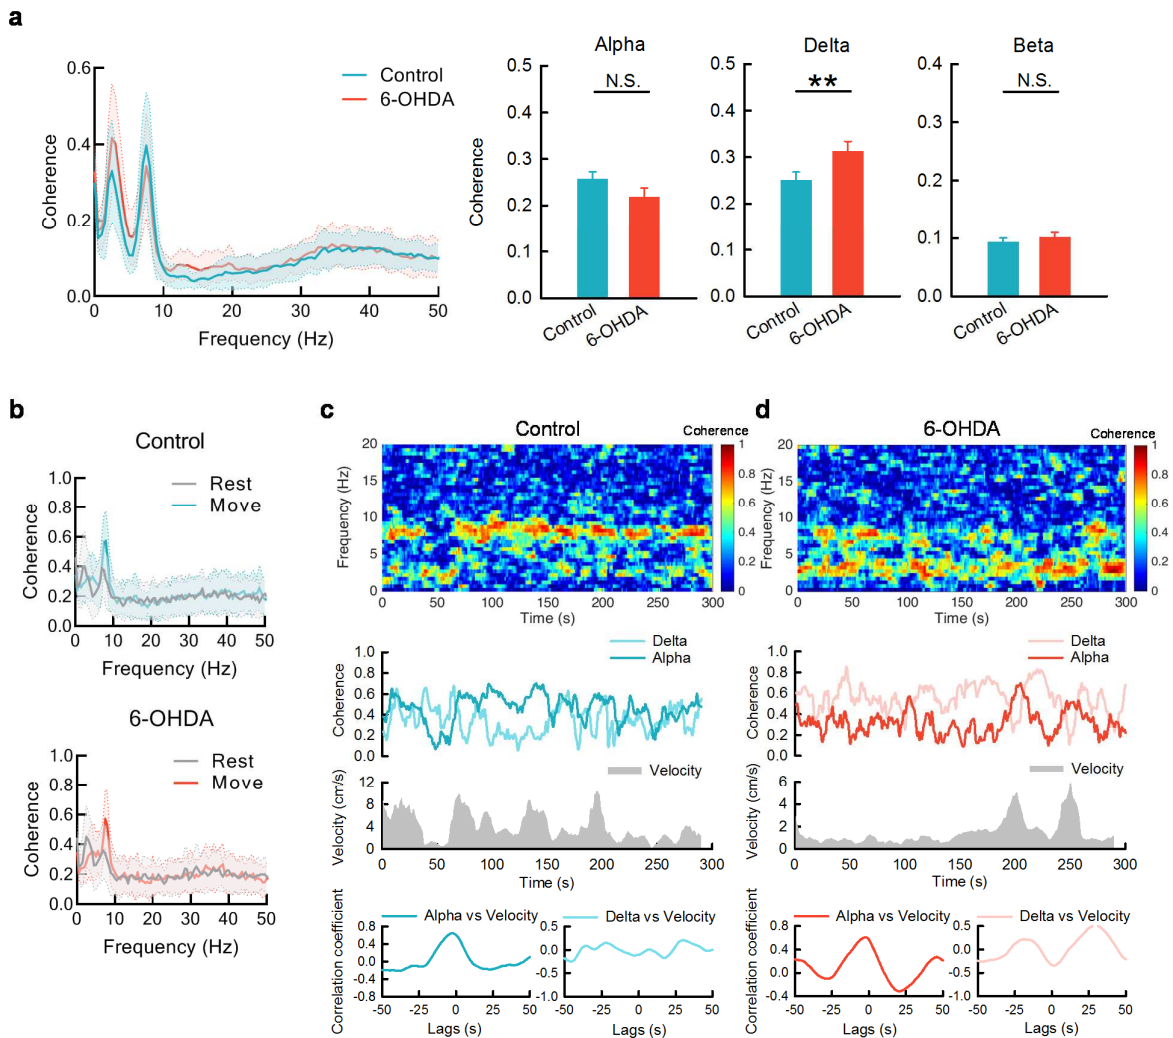

### Supplementary Figure 2. The analysis of cortico-subthalamic coherence in control and parkinsonian rats.

**a** The average coherence spectra from continuous 5-minute LFP recordings reveal slightly higher MC-STN coherence in  $\alpha$  frequencies and significantly lower coherence in  $\delta$  frequencies in control than in parkinsonian (6-OHDA) rats. The coherence in  $\beta$  frequencies shows little difference.  $n = 29$  and  $20$  recordings from  $10$  control and  $11$  parkinsonian (6-OHDA) rats, respectively. **b** The average MC-STN coherence spectra show a marked increase of MC-STN  $\alpha$  coherence from rest to movement in both control (blue) and parkinsonian rats (red). Data are collected from the same rats in Fig. 2 and 3.  $n = 52$  and  $50$  matched segments of rest and movement from  $10$  control and  $11$  parkinsonian rats, respectively. **c, d** Representative coherence spectrograms (top) and the changes of  $\alpha$  coherence (middle, upper) reveal a trend of positive correlation between  $\alpha$  coherence and moving velocity in OFT (grey areas, middle, lower) in a control (**c**) and a parkinsonian (**d**) rats. Cross-covariance analysis between time-varying  $\alpha$  coherence and moving velocity (bottom) also reveals a peak of correlation coefficient at zero time lag in both control and parkinsonian rats. There is little or just a low-level correlation between  $\delta$  coherence and moving velocity in both cases. PSD spectra are presented as mean (solid curves)  $\pm$  standard deviation (shaded areas). Data in bar graphs are presented as mean  $\pm$  S.E.M. and analyzed with Mann-Whitney U tests. \*\* $p < 0.01$ , N.S., nonsignificant.

### Supplementary Figure 3

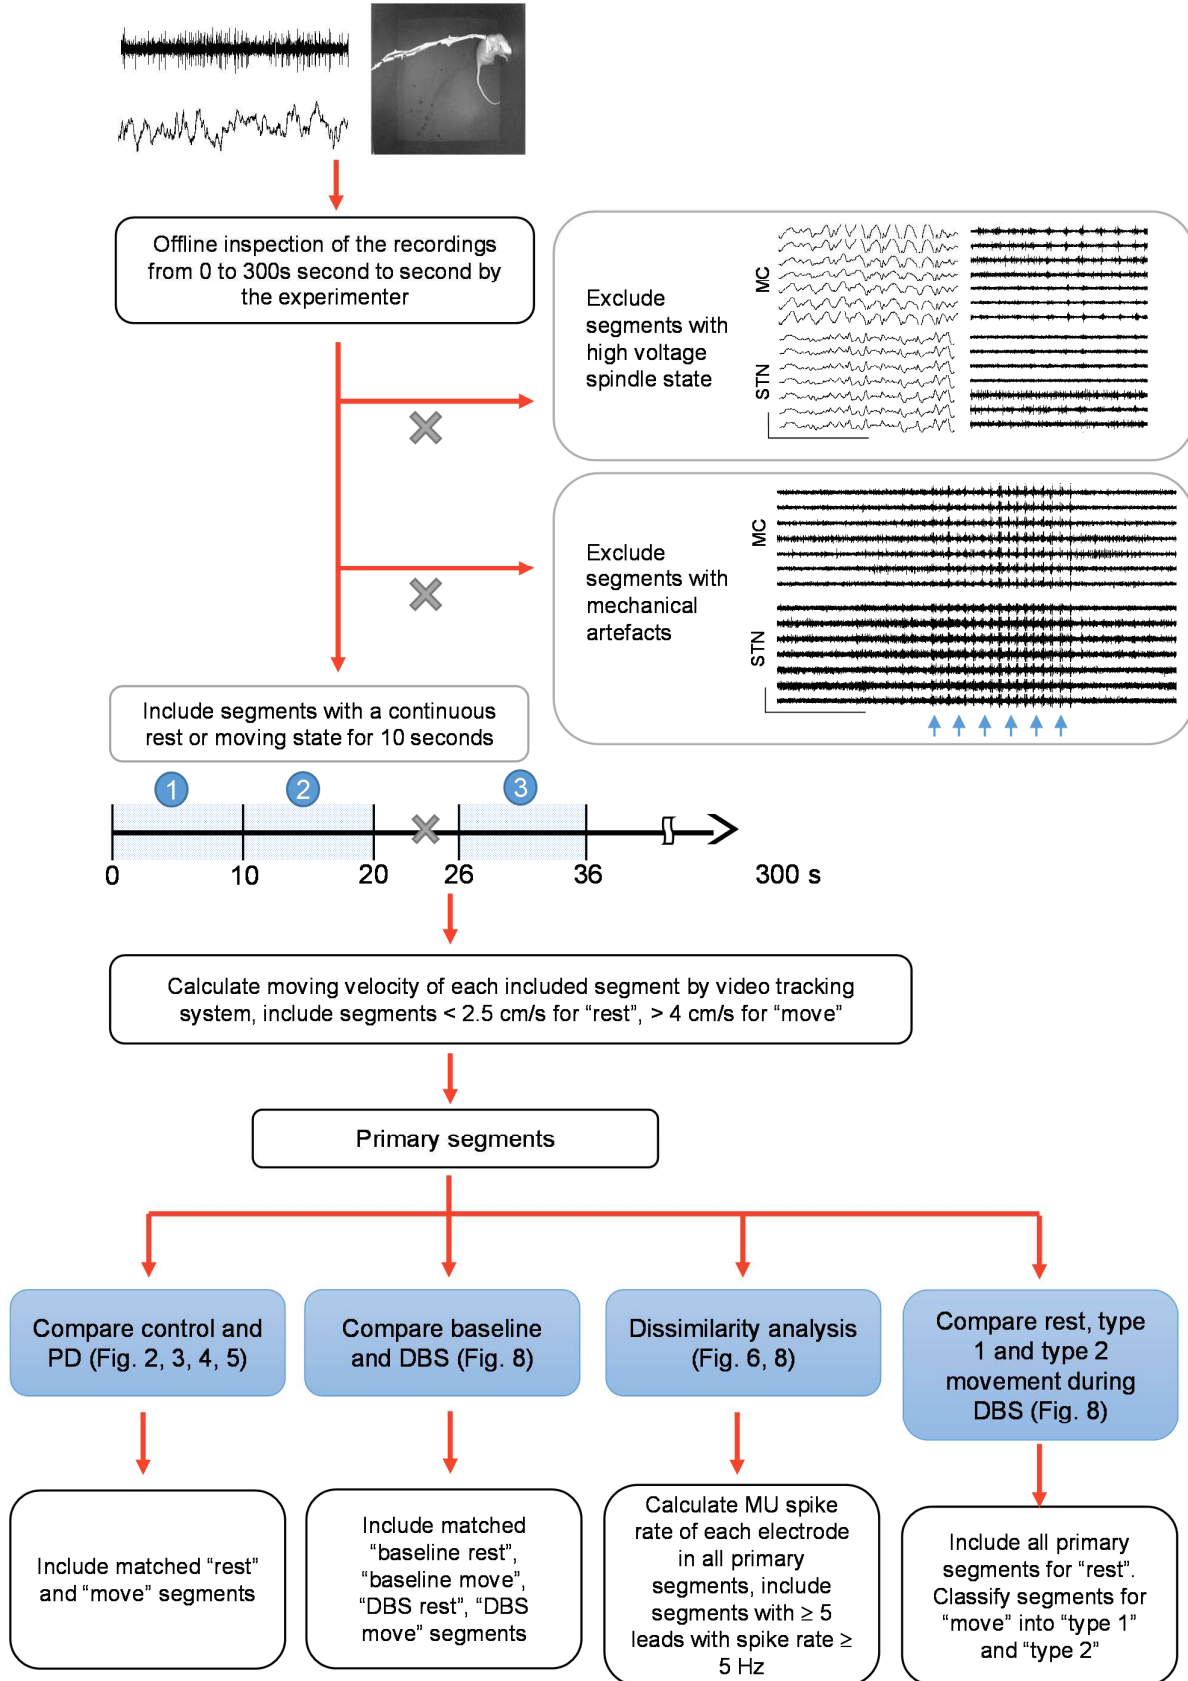

**Supplementary Figure 3. Inclusion criteria for electrophysiological analysis according to behavioral states.**

The offline-analyzed LFP, multi-unit spikes, and video recordings from each 5-minute OFT were inspected simultaneously second to second by an experimenter. Segments with 10-seconds of continuous rest or movement in video recordings without high voltage spindles or mechanical artefacts were included. States of high voltage spindles (HVS) were electrophysiologically recognized as a generalized high-amplitude (more than  $\pm 2$  mV) spike-and-wave pattern at 5-10 Hz in LFP, with concomitant generalized bursts at 5-10 Hz in spike recordings and with an abrupt onset and end. Behaviorally, the rat was motionless or “absence-like” in the video. The movement or mechanical artifacts (blue arrows) were typically recognized by the criteria detailed in Methods. The segments were included from the beginning of recording by each 10 seconds, until HVS, artefacts, or discontinuation of the behavioral state were encountered. The moving velocity of collected segments was calculated by the video tracking system, and segments with velocity  $< 2.5$  cm/s for rest and  $> 4$  cm/s for movement were included as primary segments for further analysis. For LFP and MU analysis comparing control and 6-OHDA (Figs. 2, 3, 4, and 5), matched rest and movement segments were included in chronological order. For MC MU and STN burst analysis in STN-DBS study (Fig. 8, f and g), matched rest and movement in baseline and DBS were included in reversed chronological order. For dissimilarity analysis (Figs. 6 and 8, i), all primary segments with  $\geq 5$  leads with MU spike rate  $\geq 5$  Hz were included. For LFP analysis comparing different movement states during STN-DBS (Fig. 8d), primary segments for movement were further classified into type 1 and type 2 movement according to the video criteria of type 2 movement (see Methods). Scale bars represent 1s/500 $\mu$ V.

### Supplementary Figure 4

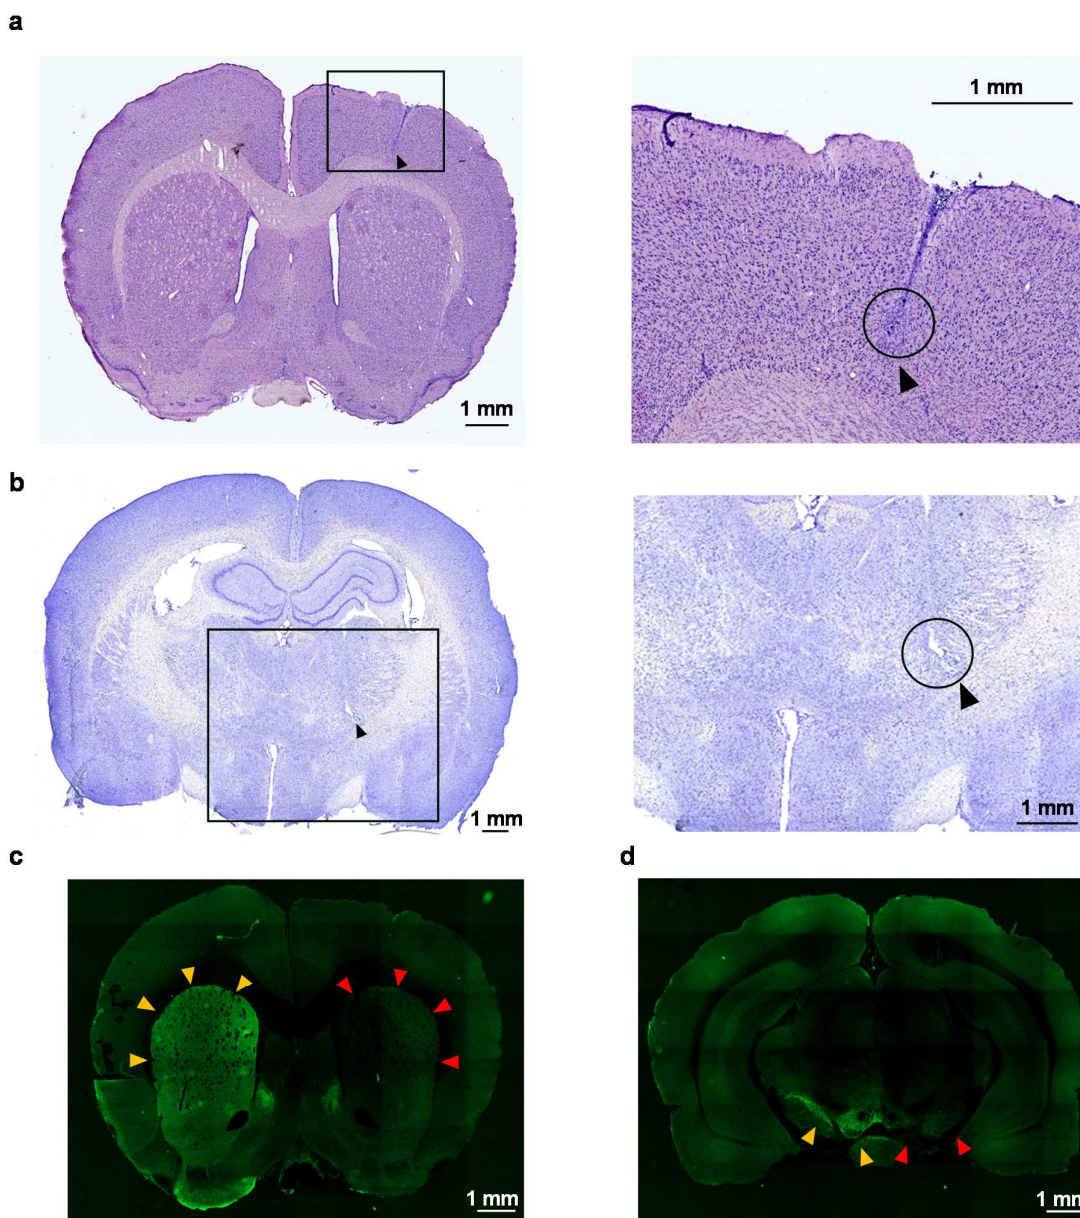

### Supplementary Figure 4. Histological examination of the location of recording electrodes and dopamine depletion by 6-OHDA.

**a, b** The locations of the recording electrode tips (indicated by black arrow heads) in MC and STN are confirmed by coronal section of rat brains with crystal violet (Nissl) staining. The right panel is zoomed from the black box in the left panel to show the locations. **c, d** Images of tyrosine hydroxylase immunohistochemistry from a rat with unilateral 6-OHDA lesion. There is unilateral loss of dopaminergic innervation in the ipsilateral striatum (**c**, red arrow heads) and the substantia nigra pars compacta and the ventral tegmental area (**d**, red arrow heads).



Supplementary Figure 5

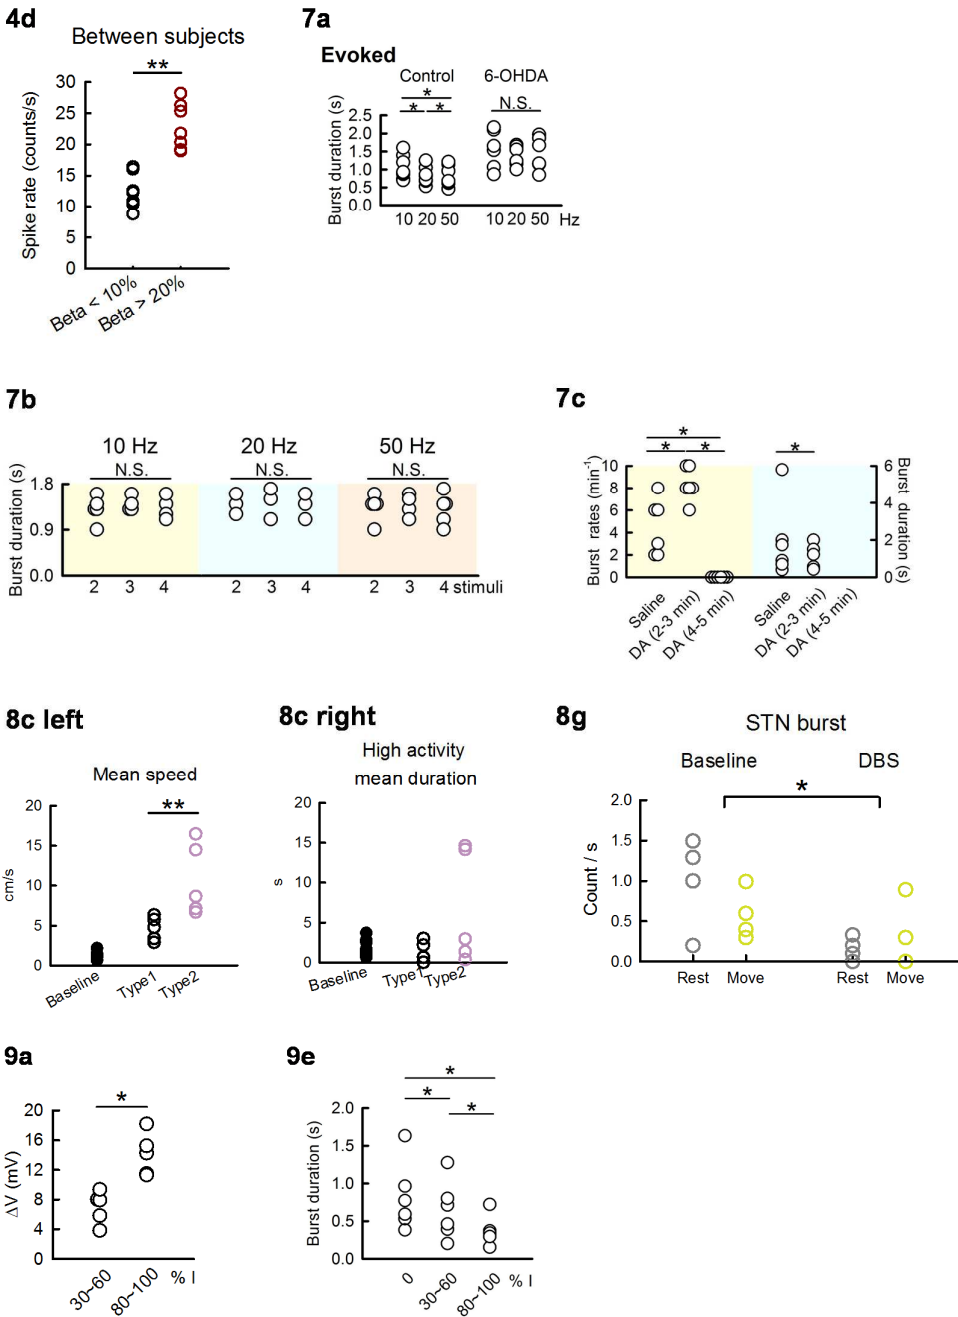

Supplementary Figure 5. Scatter plots for individual data from the dataset of bar graphs in which n < 10.

**Supplementary Table 1.** Reports of the statistical analysis results.

Fig. 1: Mann-Whitney U test

|                    | Variables | P (2-tailed) |
|--------------------|-----------|--------------|
| Control vs. 6-OHDA | MC alpha  | .002         |
|                    | MC delta  | .640         |
|                    | MC beta   | .064         |
|                    | STN alpha | .009         |
|                    | STN delta | .063         |
|                    | STN beta  | .823         |

Fig. 2c: 2 x 2 mixed model ANOVA

|          | Main effect                          | df | F       | P    | Simple main effect | F      | P    |
|----------|--------------------------------------|----|---------|------|--------------------|--------|------|
| MC alpha | Control vs 6-OHDA (Between-subjects) | 1  | 5.695   | .019 | Rest               | 8.070  | .005 |
|          |                                      |    |         |      | Move               | .691   | .407 |
|          | Rest vs Move (within-subject)        | 1  | 153.096 | .000 | Control            | 59.490 | .000 |
|          |                                      |    |         |      | 6-OHDA             | 95.376 | .000 |
|          | Interaction                          | 1  | 2.474   | .119 |                    |        |      |
| Error    | 100                                  |    |         |      |                    |        |      |
| MC delta | Control vs 6-OHDA (Between-subjects) | 1  | 2.128   | .148 | Rest               | .074   | .787 |
|          |                                      |    |         |      | Move               | 4.483  | .035 |
|          | Rest vs Move (within-subject)        | 1  | 25.639  | .000 | Control            | 6.090  | .014 |
|          |                                      |    |         |      | 6-OHDA             | 21.826 | .000 |
|          | Interaction                          | 1  | 2.585   | .111 |                    |        |      |
| Error    | 100                                  |    |         |      |                    |        |      |

Fig. 3c, 3h: 2 x 2 mixed model ANOVA

|                 | Main effect                          | df | F       | P    | Simple main effect | F       | P    |
|-----------------|--------------------------------------|----|---------|------|--------------------|---------|------|
| STN alpha       | Control vs 6-OHDA (Between-subjects) | 1  | 12.058  | .001 | Rest               | 3.605   | .059 |
|                 |                                      |    |         |      | Move               | 11.082  | .001 |
|                 | Rest vs Move (within-subject)        | 1  | 519.595 | .000 | Control            | 290.850 | .000 |
|                 |                                      |    |         |      | 6-OHDA             | 231.096 | .000 |
|                 | Interaction                          | 1  | 1.180   | .280 |                    |         |      |
| Error           | 100                                  |    |         |      |                    |         |      |
| STN delta       | Control vs 6-OHDA (Between-subjects) | 1  | 10.638  | .002 | Rest               | 9.592   | .002 |
|                 |                                      |    |         |      | Move               | 3.953   | .048 |
|                 | Rest vs Move (within-subject)        | 1  | 96.546  | .000 | Control            | 40.766  | .000 |
|                 |                                      |    |         |      | 6-OHDA             | 56.260  | .000 |
|                 | Interaction                          | 1  | .784    | .378 |                    |         |      |
| Error           | 100                                  |    |         |      |                    |         |      |
| Coherence alpha | Control vs 6-OHDA (Between-subjects) | 1  | 1.354   | .247 | Rest               | 1.334   | .249 |
|                 |                                      |    |         |      | Move               | .363    | .547 |
|                 | Rest vs Move (within-subject)        | 1  | 98.913  | .000 | Control            | 46.263  | .000 |
|                 |                                      |    |         |      | 6-OHDA             | 52.702  | .000 |
|                 | Interaction                          | 1  | .177    | .674 |                    |         |      |
| Error           | 100                                  |    |         |      |                    |         |      |
| Coherence delta | Control vs 6-OHDA (Between-subjects) | 1  | .102    | .751 | Rest               | 1.730   | .190 |
|                 |                                      |    |         |      | Move               | .588    | .444 |
|                 | Rest vs Move (within-subject)        | 1  | 38.047  | .000 | Control            | 8.685   | .004 |
|                 |                                      |    |         |      | 6-OHDA             | 33.052  | .000 |
|                 | Interaction                          | 1  | 4.168   | .044 |                    |         |      |
| Error           | 100                                  |    |         |      |                    |         |      |

Fig. 4a: 2 x 2 mixed model ANOVA

|                | Main effect                          | df | F      | P    | Simple main effect | F      | P    |
|----------------|--------------------------------------|----|--------|------|--------------------|--------|------|
| MC beta        | Control vs 6-OHDA (Between-subjects) | 1  | 18.665 | .000 | Rest               | 14.126 | .000 |
|                |                                      |    |        |      | Move               | 20.588 | .000 |
|                | Rest vs Move (within-subject)        | 1  | .612   | .436 | Control            | 0.190  | .663 |
|                |                                      |    |        |      | 6-OHDA             | 2.321  | .129 |
|                | Interaction                          | 1  | 1.940  | .167 |                    |        |      |
| Error          | 100                                  |    |        |      |                    |        |      |
| STN beta       | Control vs 6-OHDA (Between-subjects) | 1  | .196   | .659 | Rest               | 1.724  | .191 |
|                |                                      |    |        |      | Move               | .303   | .583 |
|                | Rest vs Move (within-subject)        | 1  | 15.957 | .000 | Control            | 17.287 | .000 |
|                |                                      |    |        |      | 6-OHDA             | 2.303  | .131 |
|                | Interaction                          | 1  | 3.340  | .071 |                    |        |      |
| Error          | 100                                  |    |        |      |                    |        |      |
| Coherence beta | Control vs 6-OHDA (Between-subjects) | 1  | .103   | .749 | Rest               | .001   | .974 |
|                |                                      |    |        |      | Move               | .290   | .591 |
|                | Rest vs Move (within-subject)        | 1  | .444   | .507 | Control            | .006   | .938 |
|                |                                      |    |        |      | 6-OHDA             | .734   | .392 |
|                | Interaction                          | 1  | .311   | .578 |                    |        |      |
| Error          | 100                                  |    |        |      |                    |        |      |

Fig. 4d, left: Wilcoxon signed rank test

|                        | Variables        | P (2-tailed) |
|------------------------|------------------|--------------|
| Low beta vs. High beta | MC MU Spike rate | .039         |

Fig. 4d, right: Mann-Whitney U test

|                           | Variables        | P (2-tailed) |
|---------------------------|------------------|--------------|
| Beta < 10% vs. Beta > 20% | MC MU Spike rate | .001         |

Fig. 5b, d, f, h: 2 x 2 mixed model ANOVA

|                       | Main effect                          | df | F      | P    | Simple main effect | F      | P    |
|-----------------------|--------------------------------------|----|--------|------|--------------------|--------|------|
| MC MU spike           | Control vs 6-OHDA (Between-subjects) | 1  | 64.750 | .000 | Rest               | 57.956 | .000 |
|                       |                                      |    |        |      | Move               | 66.578 | .000 |
|                       | Rest vs Move (within-subject)        | 1  | 8.081  | .005 | Control            | 9.074  | .003 |
|                       |                                      |    |        |      | 6-OHDA             | 1.056  | .304 |
|                       | Interaction                          | 1  | 1.891  | .169 |                    |        |      |
| Error                 | 712                                  |    |        |      |                    |        |      |
| STN MU spike          | Control vs 6-OHDA (Between-subjects) | 1  | .510   | .475 | Rest               | 1.916  | .166 |
|                       |                                      |    |        |      | Move               | .000   | .989 |
|                       | Rest vs Move (within-subject)        | 1  | 10.269 | .001 | Control            | 0.270  | .604 |
|                       |                                      |    |        |      | 6-OHDA             | 15.831 | .000 |
|                       | Interaction                          | 1  | 6.137  | .013 |                    |        |      |
| Error                 | 712                                  |    |        |      |                    |        |      |
| MC MU temporal change | Control vs 6-OHDA (Between-subjects) | 1  | 17.402 | .000 | Rest               | 2.885  | .092 |
|                       |                                      |    |        |      | Move               | 25.699 | .000 |
|                       | Rest vs Move (within-subject)        | 1  | 34.686 | .000 | Control            | 38.471 | .000 |
|                       |                                      |    |        |      | 6-OHDA             | 4.522  | .035 |
|                       | Interaction                          | 1  | 8.307  | .005 |                    |        |      |
| Error                 | 68                                   |    |        |      |                    |        |      |
| STN MU                | Control vs 6-OHDA                    | 1  | 1.140  | .291 | Rest               | 4.058  | .047 |



|                 |                               |   |       |      |         |       |      |
|-----------------|-------------------------------|---|-------|------|---------|-------|------|
| temporal change | (Between-subjects)            |   |       |      | Move    | .127  | .722 |
|                 | Rest vs Move (within-subject) | 1 | 1.090 | .301 | Control | 0.326 | .569 |
|                 |                               |   |       |      | 6-OHDA  | 4.637 | .034 |
|                 | Interaction                   | 1 | 3.541 | .066 |         |       |      |
| Error           | 50                            |   |       |      |         |       |      |

Fig. 6e, i: 2 x 2 independent model ANOVA

|                         | Main effect       | df | F      | P    | Simple main effect | F     | P    |
|-------------------------|-------------------|----|--------|------|--------------------|-------|------|
| MC time average of S    | Control vs 6-OHDA | 1  | .134   | .715 | Rest               | .074  | .786 |
|                         |                   |    |        |      | Move               | .061  | .806 |
|                         | Rest vs Move      | 1  | 11.977 | .001 | Control            | 5.027 | .027 |
|                         |                   |    |        |      | 6-OHDA             | 7.380 | .008 |
|                         | Interaction       | 1  | .000   | .991 |                    |       |      |
| Error                   | 118               |    |        |      |                    |       |      |
| MC total power of S(t)  | Control vs 6-OHDA | 1  | 8.490  | .004 | Rest               | 1.543 | .217 |
|                         |                   |    |        |      | Move               | 8.123 | .005 |
|                         | Rest vs Move      | 1  | 8.714  | .004 | Control            | 7.247 | .008 |
|                         |                   |    |        |      | 6-OHDA             | 1.903 | .170 |
|                         | Interaction       | 1  | 1.413  | .237 |                    |       |      |
| Error                   | 118               |    |        |      |                    |       |      |
| STN time average of S   | Control vs 6-OHDA | 1  | .418   | .519 | Rest               | .166  | .684 |
|                         |                   |    |        |      | Move               | 1.728 | .191 |
|                         | Rest vs Move      | 1  | .011   | .916 | Control            | 1.125 | .291 |
|                         |                   |    |        |      | 6-OHDA             | .510  | .477 |
|                         | Interaction       | 1  | 1.490  | .225 |                    |       |      |
| Error                   | 106               |    |        |      |                    |       |      |
| STN total power of S(t) | Control vs 6-OHDA | 1  | 5.241  | .024 | Rest               | 3.767 | .055 |
|                         |                   |    |        |      | Move               | 1.688 | .197 |
|                         | Rest vs Move      | 1  | 3.826  | .053 | Control            | 3.685 | .058 |
|                         |                   |    |        |      | 6-OHDA             | .938  | .335 |
|                         | Interaction       | 1  |        |      |                    |       |      |
| Error                   | 106               |    |        |      |                    |       |      |

Fig. 7a, Evoked: Friedman tests

|                                    | Variables          | P (2-tailed) |
|------------------------------------|--------------------|--------------|
| Control<br>10 Hz vs 20 Hz vs 50 Hz | Burst duration (s) | .000         |
| 6-OHDA<br>10 Hz vs 20 Hz vs 50 Hz  | Burst duration (s) | .206         |

Fig. 7a, Evoked: Wilcoxon signed rank test

|                            | Variables          | P (2-tailed) |
|----------------------------|--------------------|--------------|
| Control<br>10 Hz vs. 20 Hz | Burst duration (s) | .012         |
| Control<br>20 Hz vs. 50 Hz | Burst duration (s) | .011         |
| Control<br>10 Hz vs. 50 Hz | Burst duration (s) | .012         |

Fig. 7a, Spontaneous: Mann-Whitney U test

|                   | Variables      | P (2-tailed) |
|-------------------|----------------|--------------|
| Control vs 6-OHDA | %time in burst | .009         |

Fig. 7b: Friedman tests

|                              | Variables          | P (2-tailed) |
|------------------------------|--------------------|--------------|
| 10 Hz stimuli<br>2 vs 3 vs 4 | Burst duration (s) | .717         |
| 20 Hz stimuli<br>2 vs 3 vs 4 | Burst duration (s) | .368         |
| 50 Hz stimuli<br>2 vs 3 vs 4 | Burst duration (s) | .779         |

Fig. 7c, left: Friedman tests

|                                           | Variables                       | P (2-tailed) |
|-------------------------------------------|---------------------------------|--------------|
| Saline vs DA (2-3 min) vs<br>DA (4-5 min) | Burst rate (min <sup>-1</sup> ) | .003         |

Fig. 7c: Wilcoxon signed rank test

|                                 | Variables                       | P (2-tailed) |
|---------------------------------|---------------------------------|--------------|
| Saline vs DA (2-3 min)          | Burst rate (min <sup>-1</sup> ) | .043         |
| DA (2-3 min) vs DA (4-5<br>min) | Burst rate (min <sup>-1</sup> ) | .026         |
| Saline vs DA (4-5 min)          | Burst rate (min <sup>-1</sup> ) | .027         |
| Saline vs DA (2-3 min)          | Burst duration (s)              | .046         |

Fig. 8a: ANCOVA

| Dependent variable                       | Covariate | df | Error | Behavioral variables | F                   | P    |
|------------------------------------------|-----------|----|-------|----------------------|---------------------|------|
| <b>DBS</b>                               | Sham      | 1  | 19    | Total distance       | 30.277              | .000 |
|                                          |           |    |       | Fast moving time     | 10.407              | .004 |
|                                          |           |    |       | Max speed            | 15.514 <sup>#</sup> | .000 |
|                                          |           |    |       | Rest time            | 43.520              | .000 |
| <b><sup>#</sup>Johnson-Neyman method</b> |           |    |       |                      |                     |      |

Fig. 8c: Mann-Whitney U test

|                 | Behavioral variables        | P (2-tailed) |
|-----------------|-----------------------------|--------------|
| Type1 vs Type 2 | Mean speed                  | .008         |
|                 | High activity mean duration | .310         |

Fig. 8d: one-way ANOVA

| Dependent variables | df | Error | F       | P    | Games-Howell<br><i>post hoc</i> test | P    | 95% Confidence Interval |             |
|---------------------|----|-------|---------|------|--------------------------------------|------|-------------------------|-------------|
|                     |    |       |         |      |                                      |      | Lower Bound             | Upper Bound |
| MC alpha            | 1  | 19    | 23.826* | .000 | Rest-Type1                           | .000 | -6.0977                 | -2.9629     |
|                     |    |       |         |      | Rest-Type2                           | .089 | -4.1242                 | .2588       |
|                     |    |       |         |      | Type1-Type2                          | .036 | .1493                   | 5.0458      |
| STN alpha           | 1  | 19    | 47.073* | .000 | Rest-Type1                           | .000 | -14.6630                | -8.7138     |
|                     |    |       |         |      | Rest-Type2                           | .002 | -9.3318                 | -2.2845     |
|                     |    |       |         |      | Type1-Type2                          | .004 | 1.6834                  | 10.0770     |
| Coherence<br>alpha  | 1  | 19    | 3.633   | .028 | Rest-Type1                           | .020 | -.0723                  | -.0051      |
|                     |    |       |         |      | Rest-Type2                           | .721 | -.1202                  | .0648       |
|                     |    |       |         |      | Type1-Type2                          | .951 | -.0824                  | .1043       |
| MC delta            | 1  | 19    | 3.638   | .028 | Rest-Type1                           | .278 | -1.2768                 | 5.9899      |
|                     |    |       |         |      | Rest-Type2                           | .144 | -12.4742                | 1.5488      |
|                     |    |       |         |      | Type1-Type2                          | .026 | -14.7667                | -.8717      |

|                 |   |    |         |      |             |      |         |         |
|-----------------|---|----|---------|------|-------------|------|---------|---------|
| STN delta       | 1 | 19 | 9.287   | .000 | Rest-Type1  | .000 | 3.2056  | 11.6046 |
|                 |   |    |         |      | Rest-Type2  | .131 | -1.8396 | 16.3003 |
|                 |   |    |         |      | Type1-Type2 | .999 | -9.3175 | 8.9679  |
| Coherence delta | 1 | 19 | 14.244* | .000 | Rest-Type1  | .000 | .0427   | .1102   |
|                 |   |    |         |      | Rest-Type2  | .420 | -.0400  | .1216   |
|                 |   |    |         |      | Type1-Type2 | .479 | -.1139  | .0426   |
| MC beta         | 1 | 19 | 3.079   | .048 | Rest-Type1  | .251 | -3.7658 | .7321   |
|                 |   |    |         |      | Rest-Type2  | .264 | -1.5564 | 6.9512  |
|                 |   |    |         |      | Type1-Type2 | .054 | -.0602  | 8.4888  |
| STN beta        | 1 | 19 | 2.409   | .093 | Rest-Type1  | .661 | -.5070  | 1.0947  |
|                 |   |    |         |      | Rest-Type2  | .486 | -3.8574 | 1.4646  |
|                 |   |    |         |      | Type1-Type2 | .344 | -4.1689 | 1.1884  |
| Coherence beta  | 1 | 19 | 4.117   | .018 | Rest-Type1  | .440 | -.0100  | .0314   |
|                 |   |    |         |      | Rest-Type2  | .047 | .0005   | .0947   |
|                 |   |    |         |      | Type1-Type2 | .139 | -.0102  | .0840   |

\*Welch's F test

Fig. 8f, g: 2 x 2 dependent model ANOVA

|                  | Main effect     | df  | F      | P    | Simple main effect | F     | P    |
|------------------|-----------------|-----|--------|------|--------------------|-------|------|
| MC MU spike rate | Baseline vs DBS | 1   | 6.674  | .011 | Rest               | 1.082 | .299 |
|                  |                 |     |        |      | Move               | .817  | .367 |
|                  | Rest vs Move    | 1   | 2.218  | .139 | Baseline           | .113  | .737 |
|                  |                 |     |        |      | DBS                | .224  | .636 |
|                  | Interaction     | 1   | .082   | .775 |                    |       |      |
|                  | Error           | 146 |        |      |                    |       |      |
| Error (all)      | 587             |     |        |      |                    |       |      |
| STN burst rate   | Baseline vs DBS | 1   | 12.278 | .025 | Rest               | 9.196 | .008 |
|                  |                 |     |        |      | Move               | 3.478 | .081 |
|                  | Rest vs Move    | 1   | .538   | .504 | Baseline           | .820  | .379 |
|                  |                 |     |        |      | DBS                | .069  | .797 |
|                  | Interaction     | 1   | 3.451  | .137 |                    |       |      |
|                  | Error           | 4   |        |      |                    |       |      |
| Error (all)      | 19              |     |        |      |                    |       |      |

Fig. 8i: 2 x 2 independent model ANOVA

|                        | Main effect     | df | F     | P    | Simple main effect | F     | P    |
|------------------------|-----------------|----|-------|------|--------------------|-------|------|
| MC total power of S(t) | Baseline vs DBS | 1  | .235  | .628 | Rest               | 1.759 | .187 |
|                        |                 |    |       |      | Move               | .360  | .549 |
|                        | Rest vs Move    | 1  | 3.260 | .074 | Baseline           | .102  | .749 |
|                        |                 |    |       |      | DBS                | 5.014 | .027 |
|                        | Interaction     | 1  | 1.827 | .179 |                    |       |      |
| Error                  | 117             |    |       |      |                    |       |      |

Fig. 9a: Wilcoxon signed rank test

|                       | Variables       | P (2-tailed) |
|-----------------------|-----------------|--------------|
| %I<br>30~60 vs 80~100 | $\Delta V$ (mV) | .043         |

Fig. 9e: Friedman tests

|                            | Variables          | P (2-tailed) |
|----------------------------|--------------------|--------------|
| %I<br>0 vs 30~60 vs 80~100 | Burst duration (s) | .007         |

Fig. 9e: Wilcoxon signed rank test

|                       | Variables          | P (2-tailed) |
|-----------------------|--------------------|--------------|
| %I<br>0 vs 30~60      | Burst duration (s) | .028         |
| %I<br>30~60 vs 80~100 | Burst duration (s) | .043         |
| %I<br>0 vs 80~100     | Burst duration (s) | .043         |

Fig. S1a, d: Mann-Whitney U test

|                       | Variables       | P (2-tailed) |
|-----------------------|-----------------|--------------|
| Control vs.<br>6-OHDA | MC total power  | .760         |
|                       | STN total power | .122         |

|               | Variables | P (2-tailed) |
|---------------|-----------|--------------|
| Rest vs. Move | STN alpha | .000         |
|               | STN delta | .043         |
|               | STN beta  | .550         |

Fig. S2a: Mann-Whitney U test

|                       | Variables       | P (2-tailed) |
|-----------------------|-----------------|--------------|
| Control vs.<br>6-OHDA | Coherence alpha | .138         |
|                       | Coherence delta | .009         |
|                       | Coherence beta  | .452         |
